# Supplementary material for: Effect of ancestry and shared genetic architecture of serious mental illness on symptoms and cognition in an admixed Latin American population
Source: Research Square preprint supplement (doi:10.21203/rs.3.rs-9658547/v1), 2026-06-05

sFig 1.

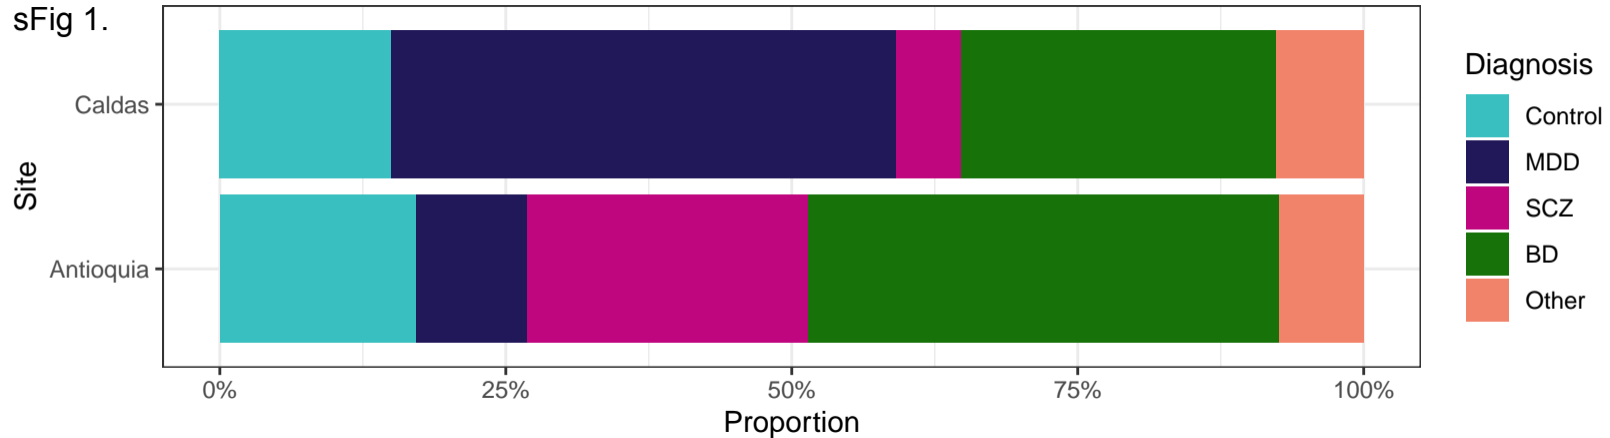

# Accuracy

sFig 2

Diagnosis Control MDD SCZ BD1

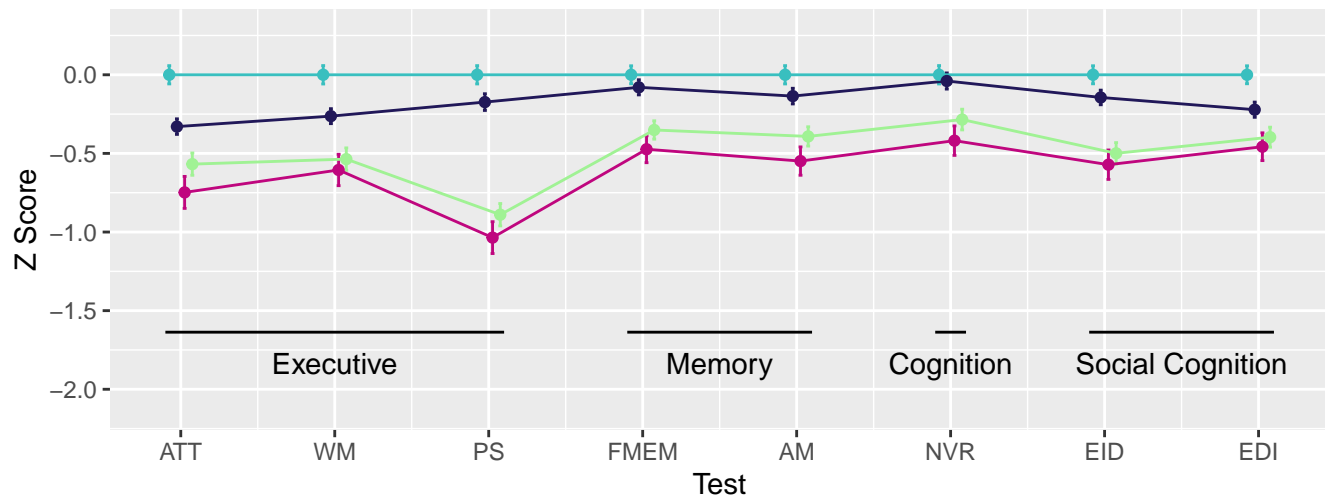

# Speed

Diagnosis Control MDD SCZ BD1

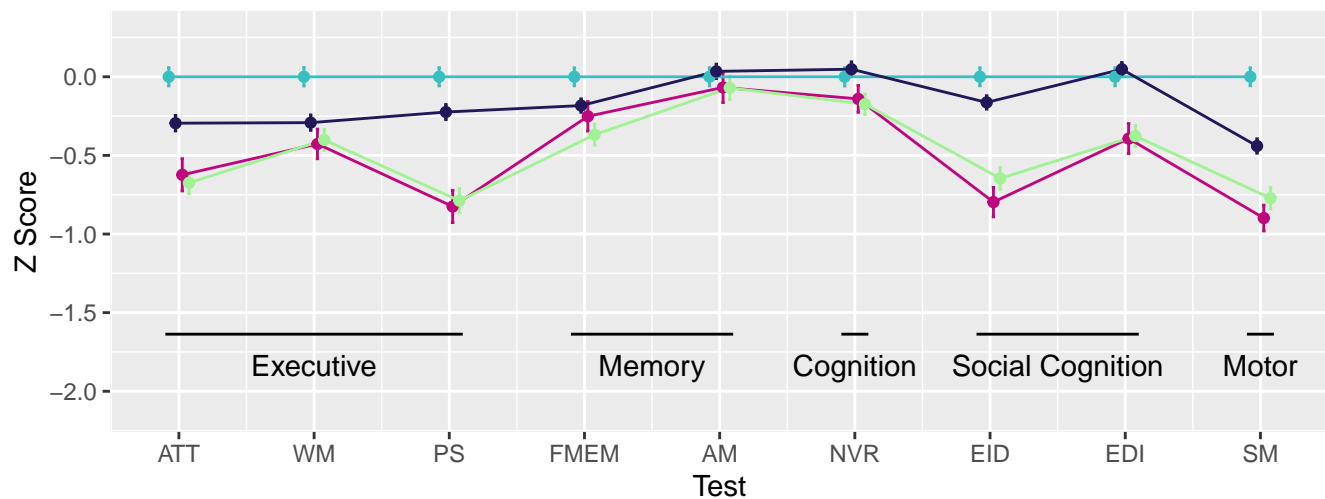

**SCZ Univariate** **sFig 3**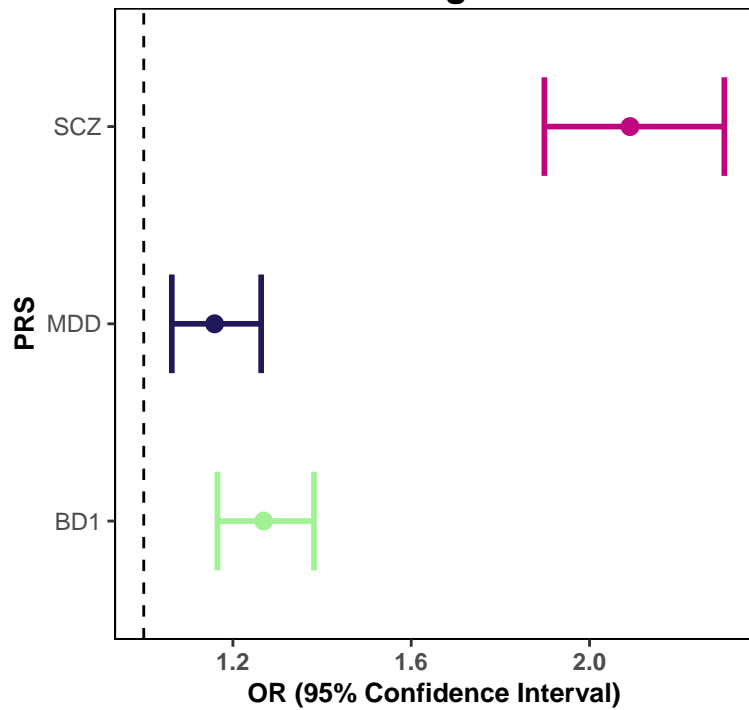**MDD Univariate**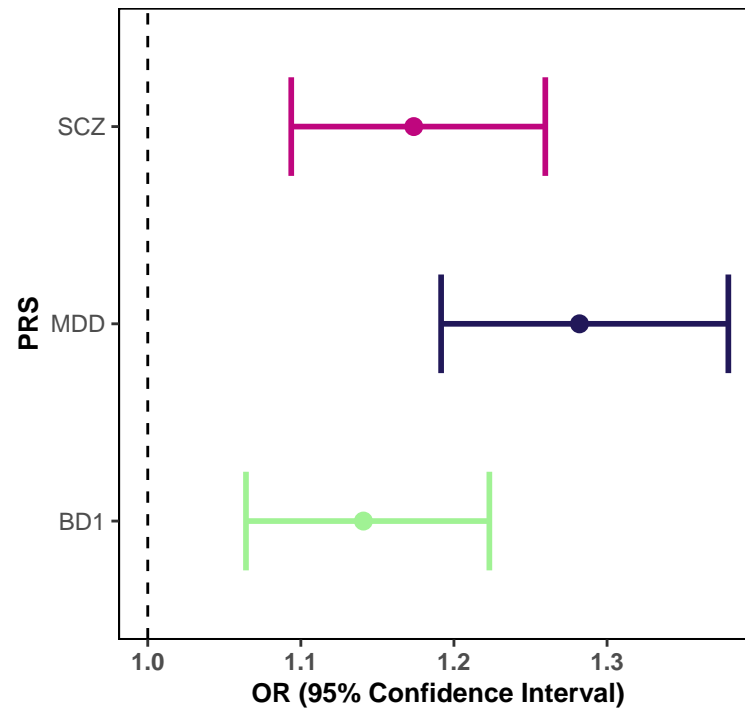**BD1 Univariate**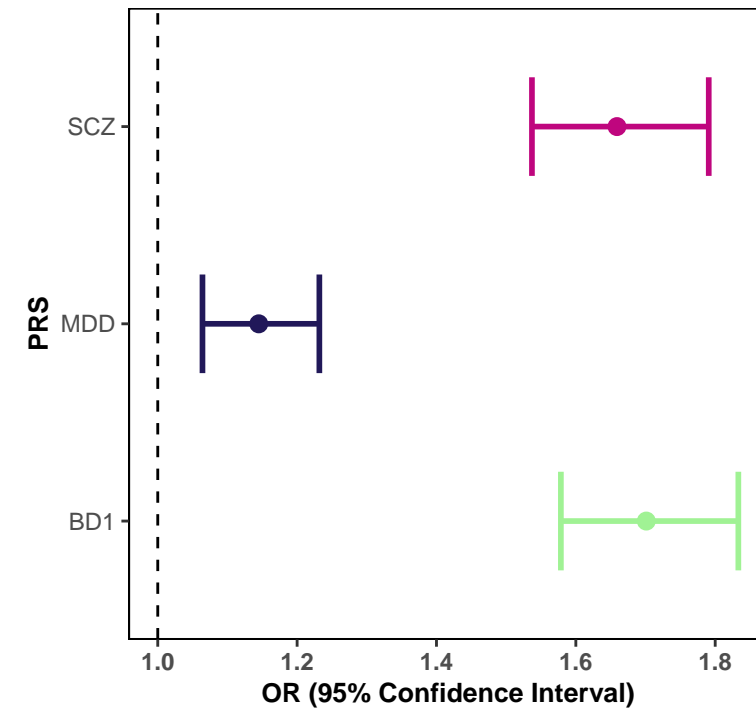**SCZ Multivariate**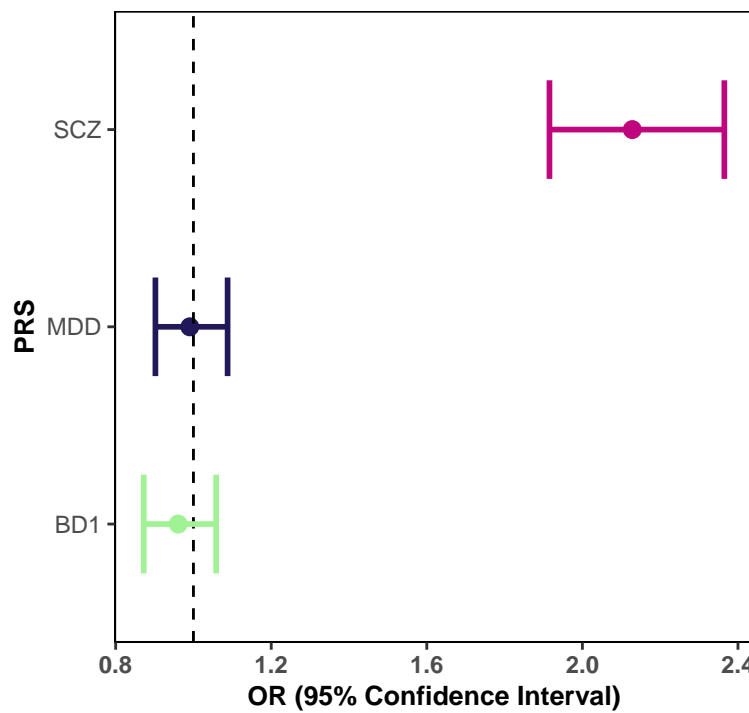**MDD Multivariate**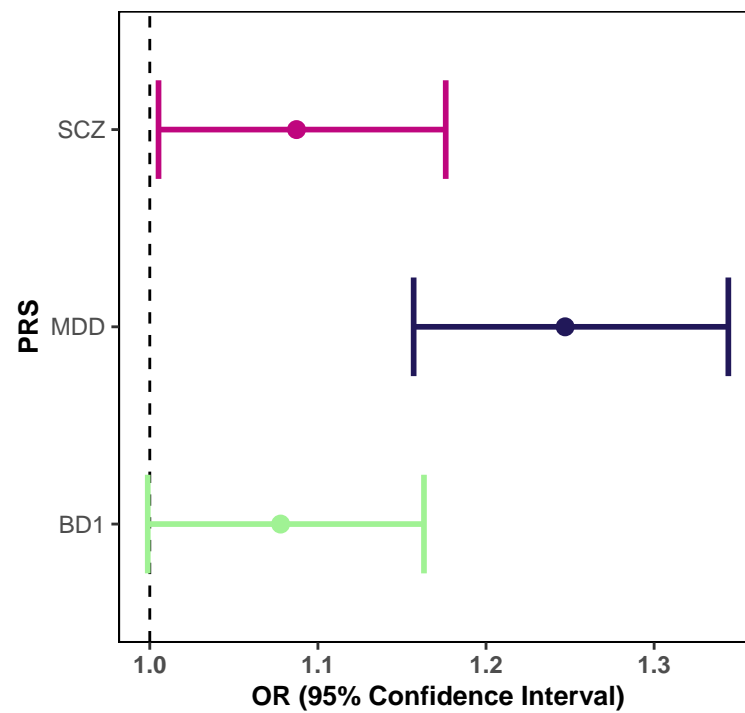**BD1 Multivariate**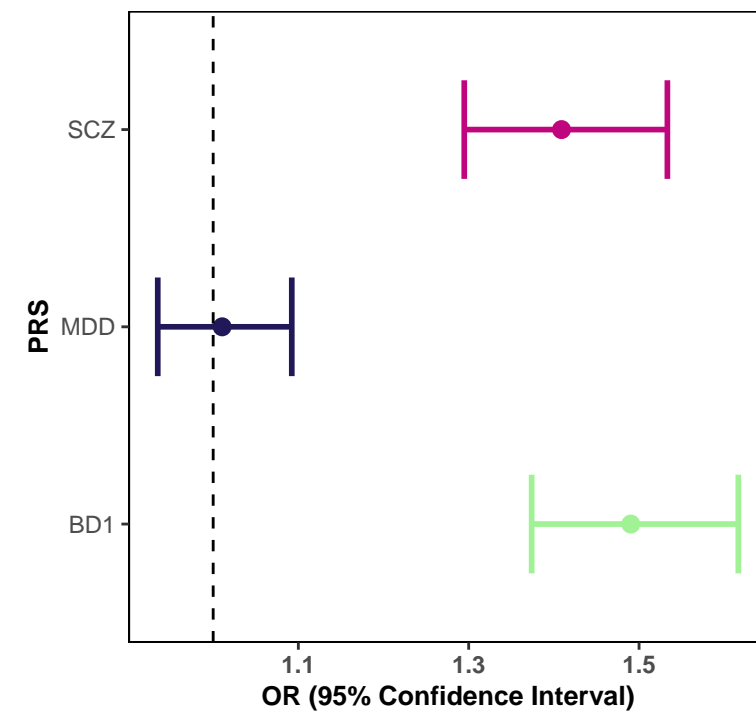

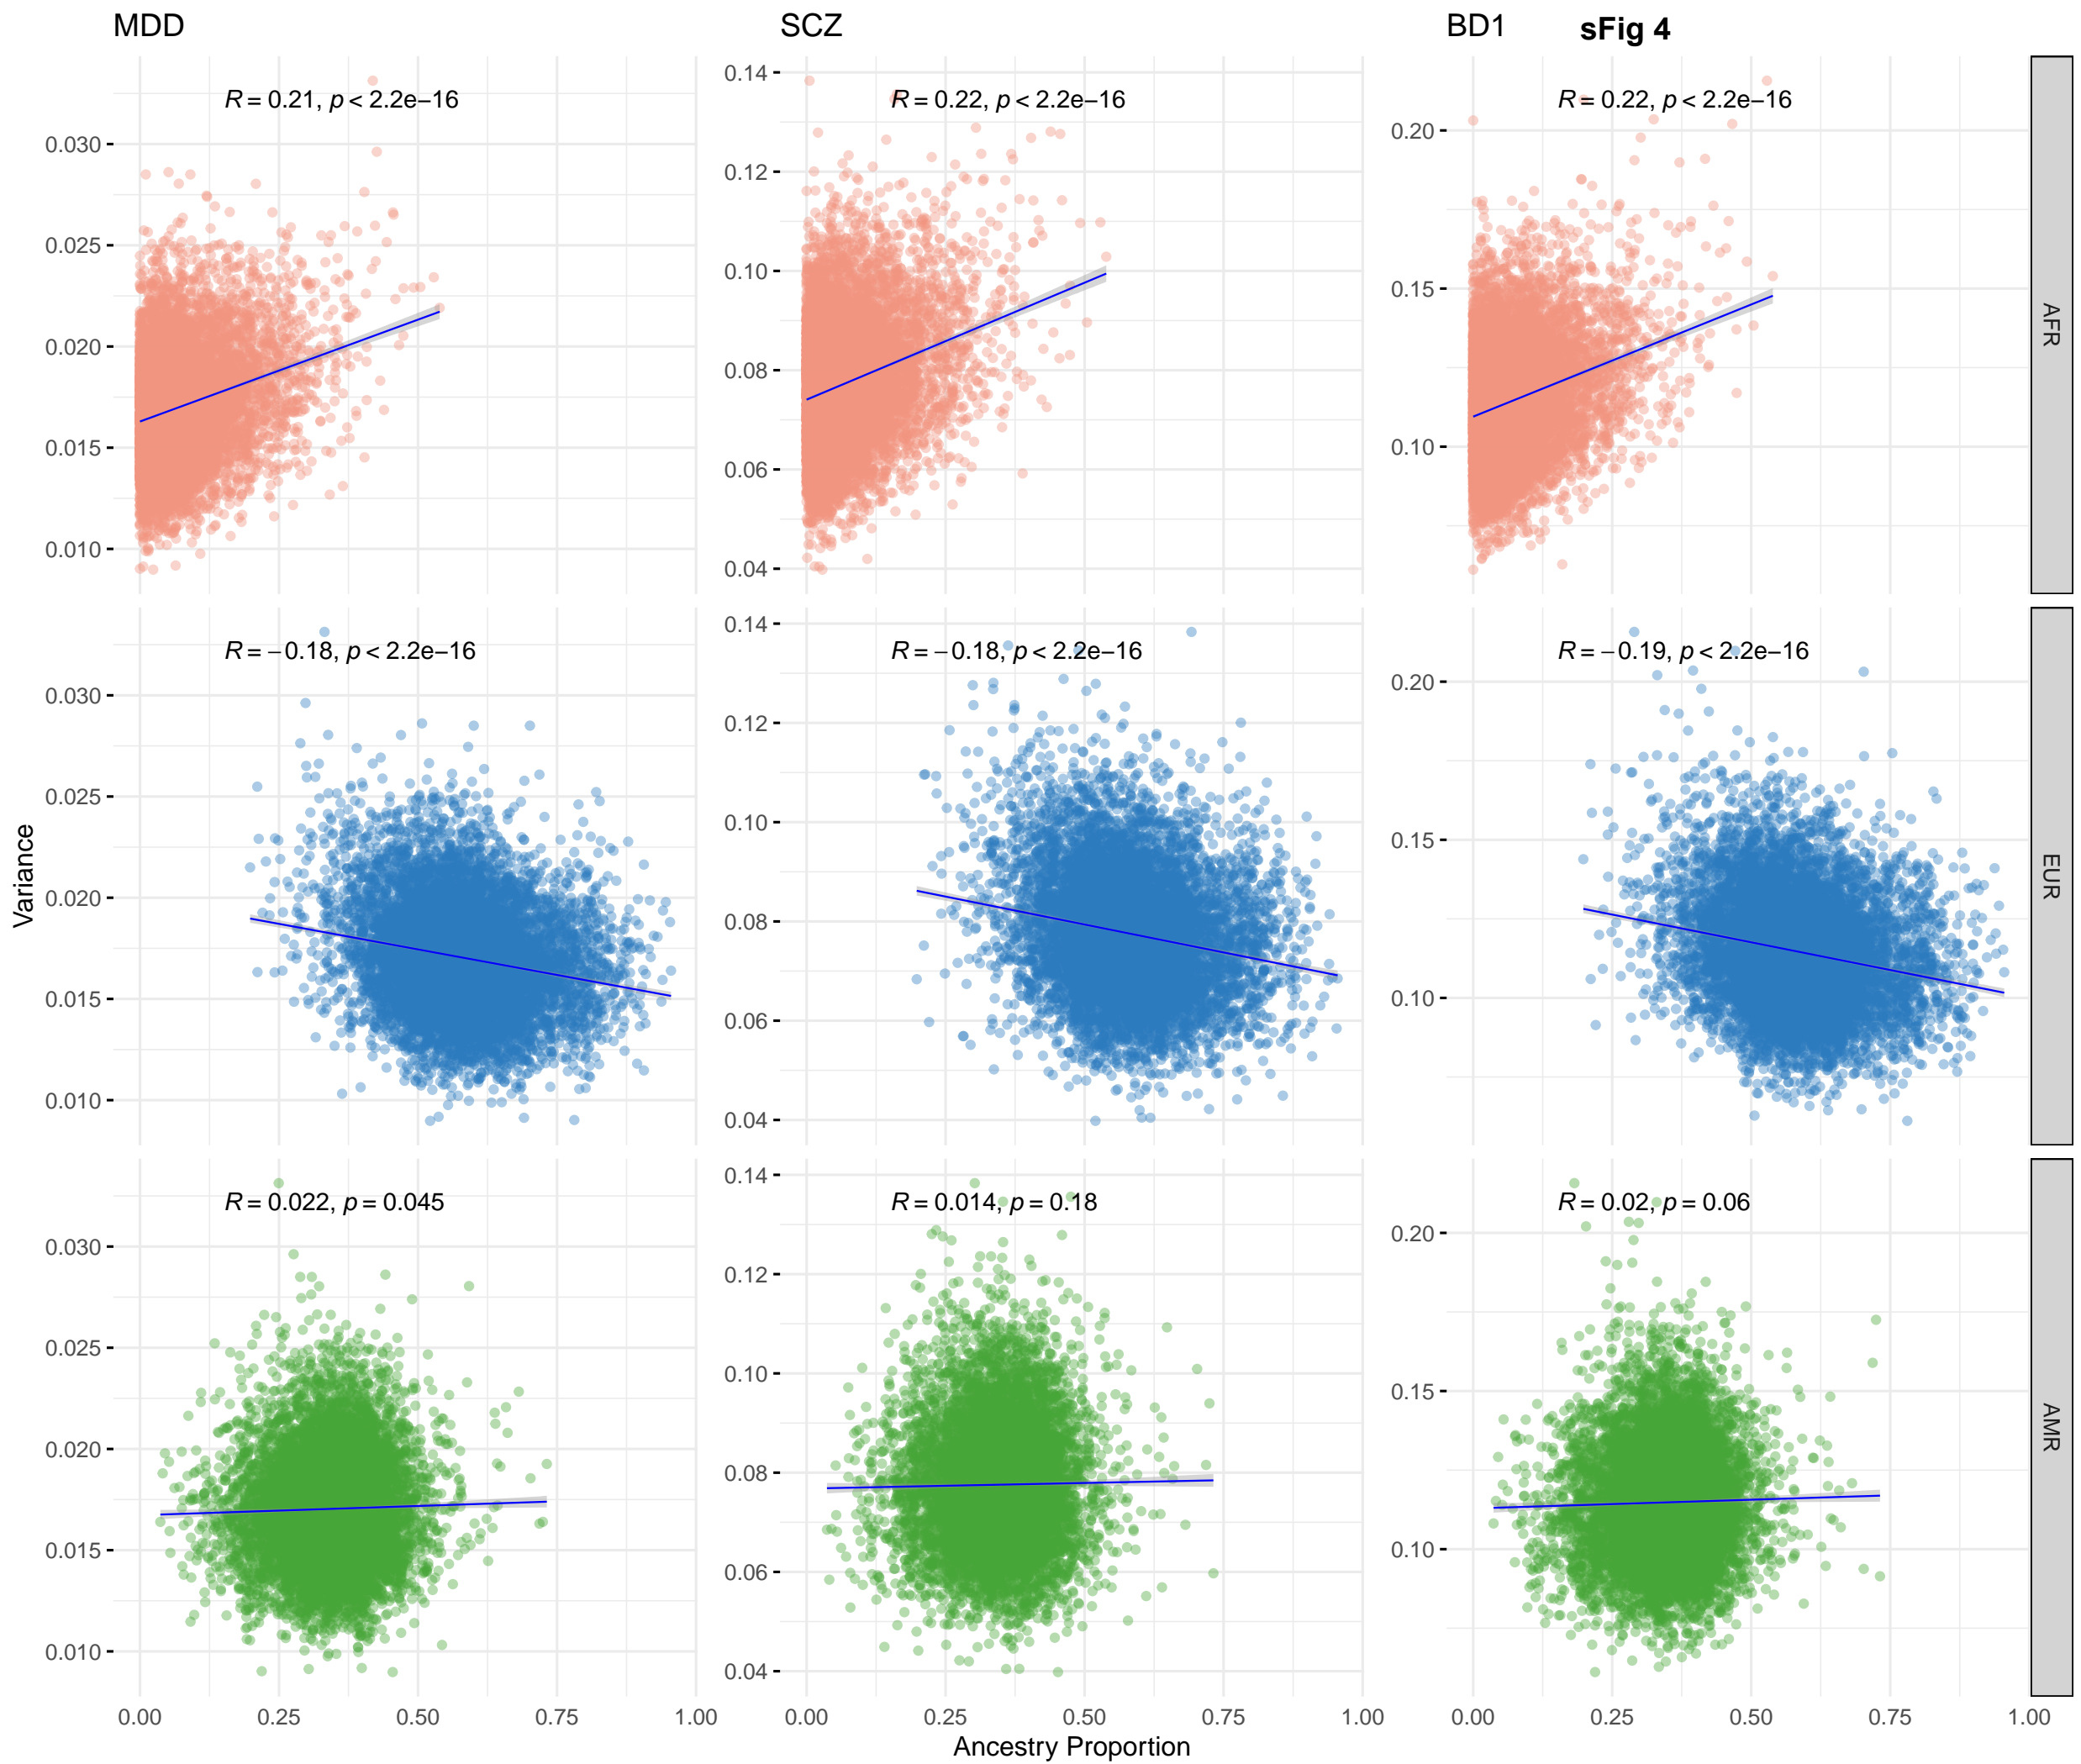

**sFig 5.**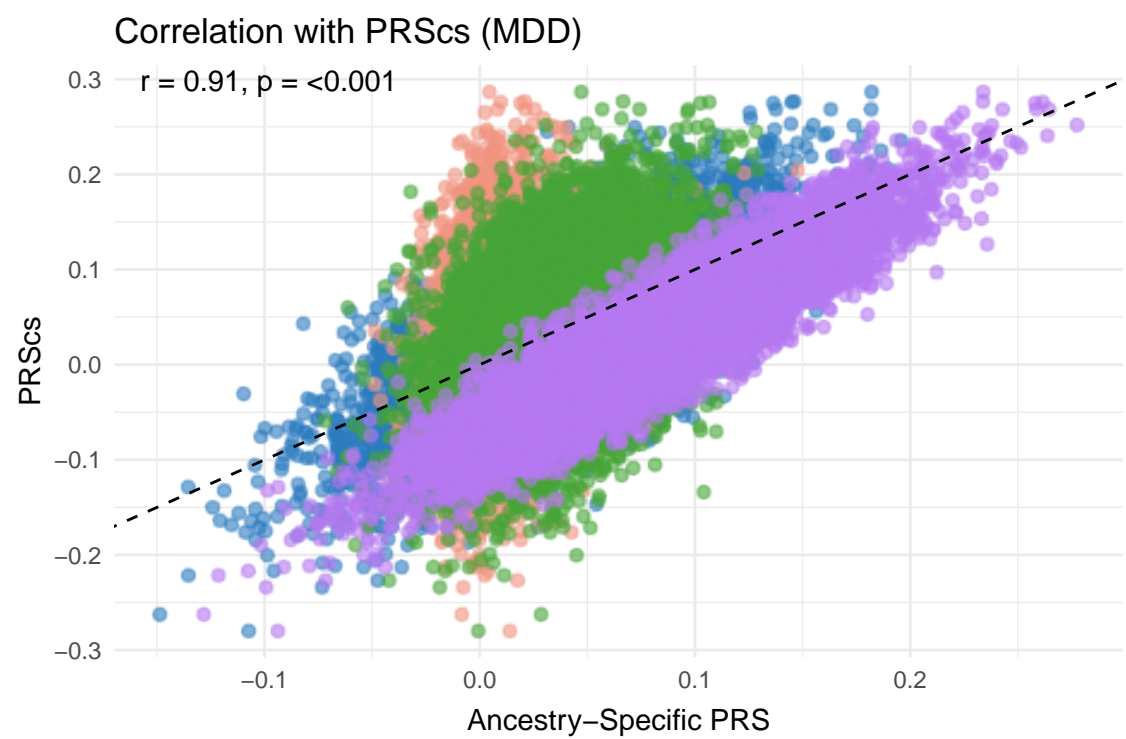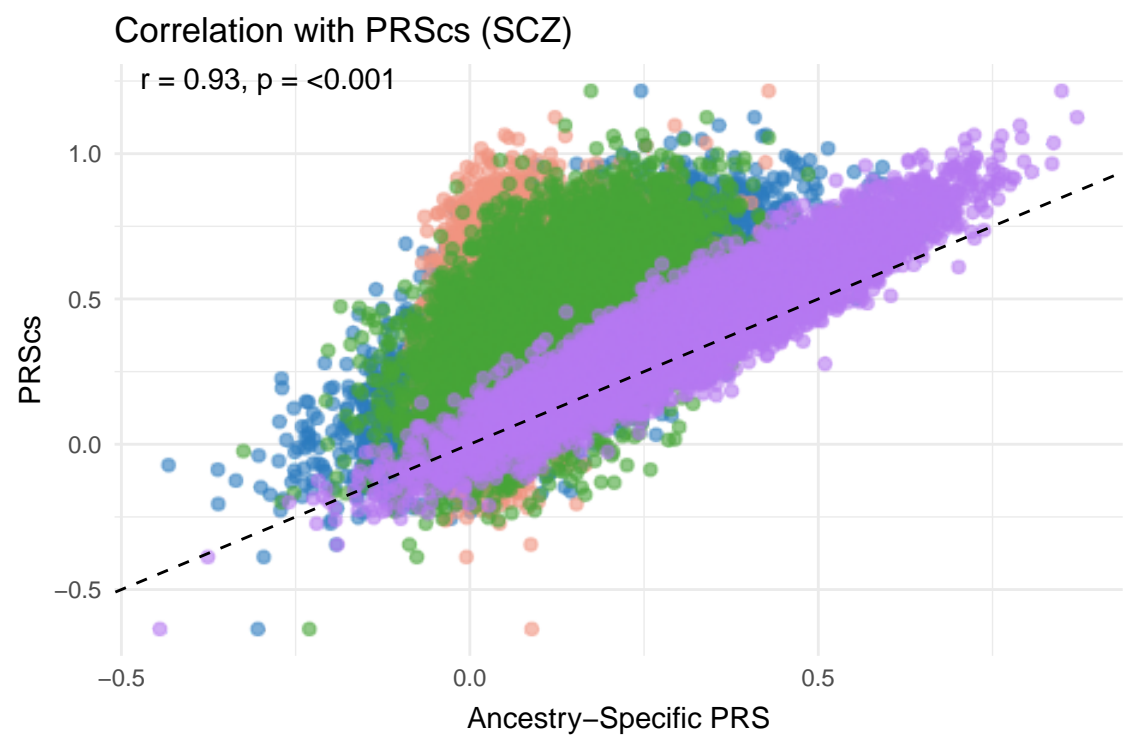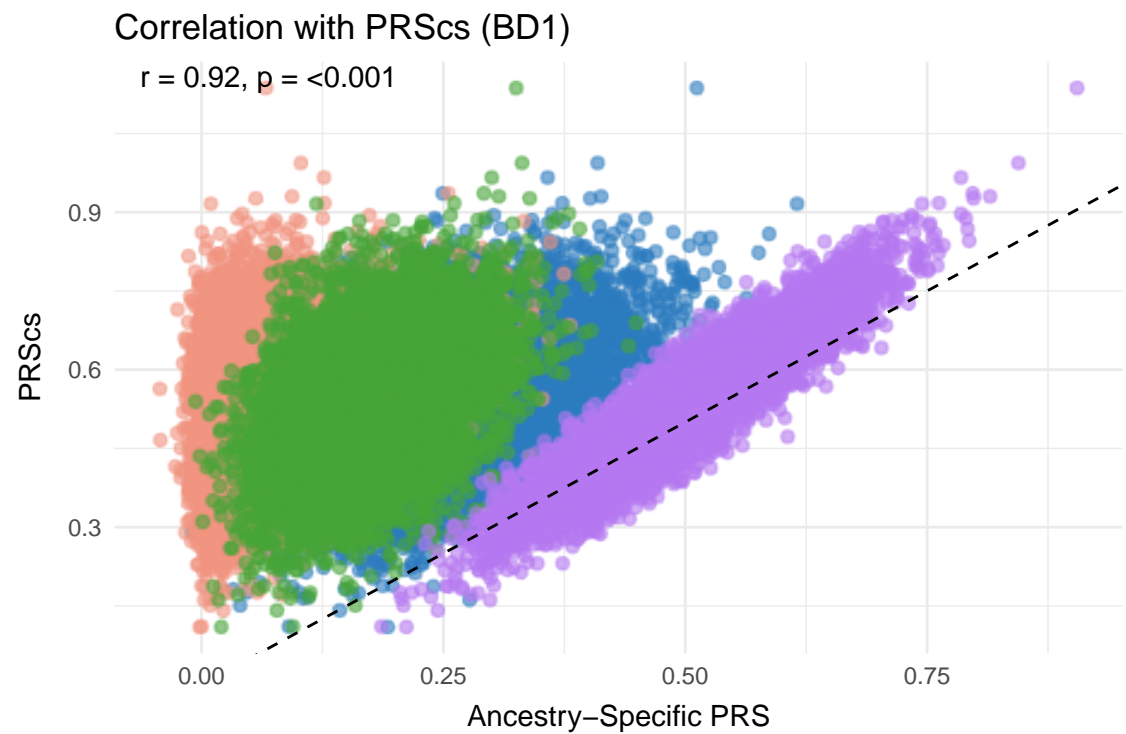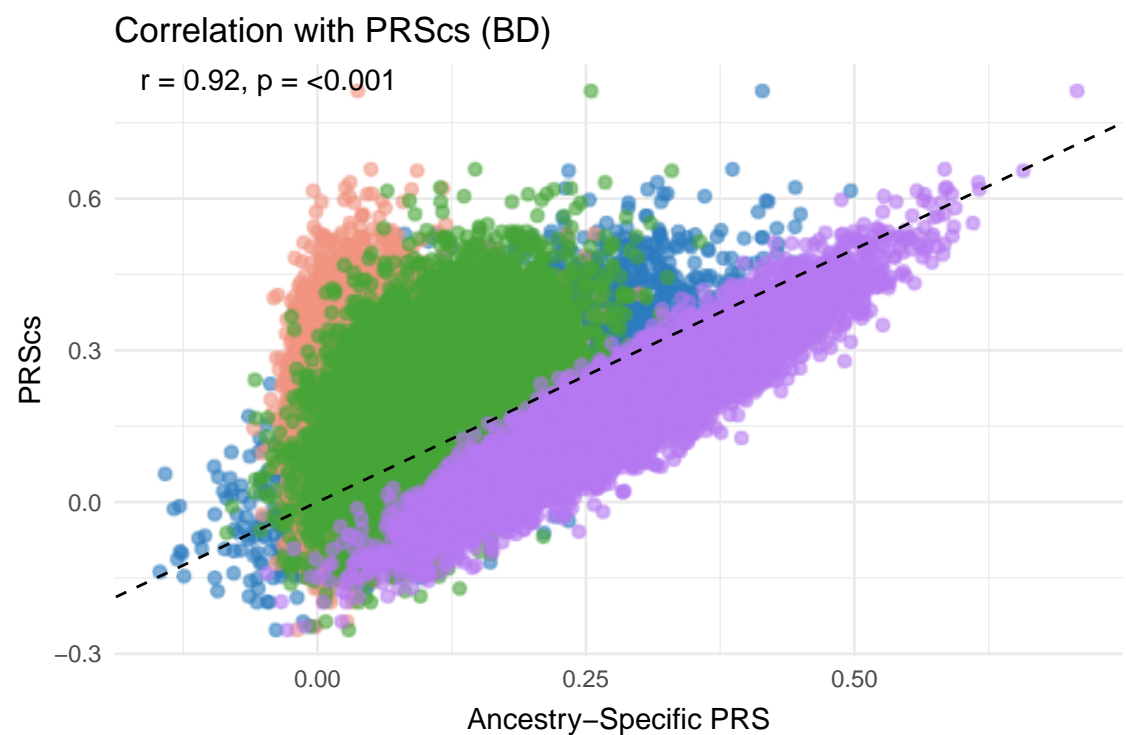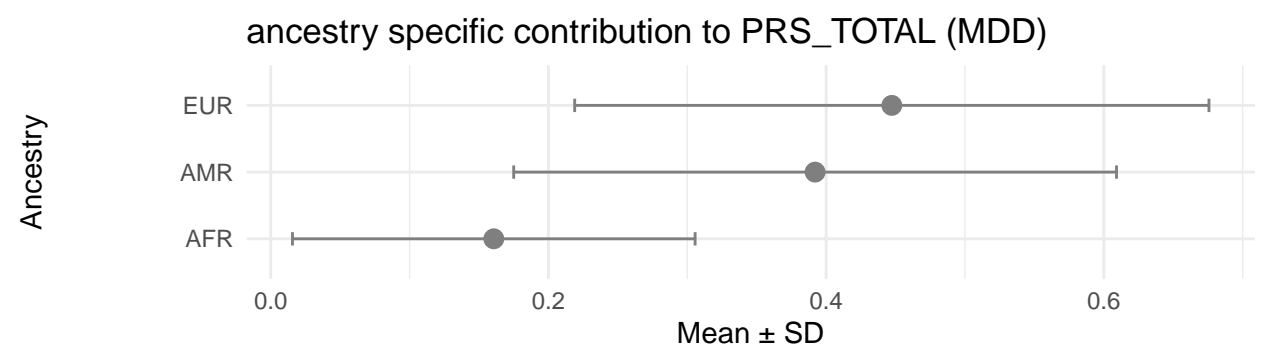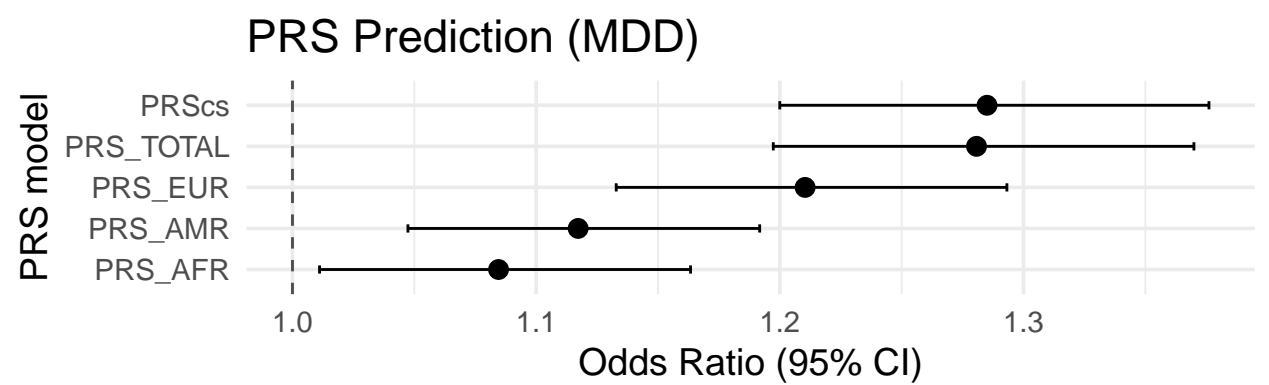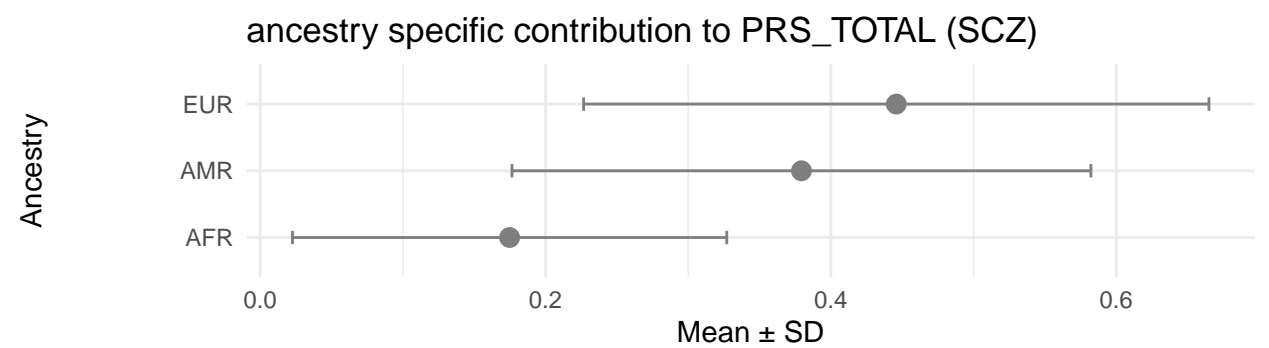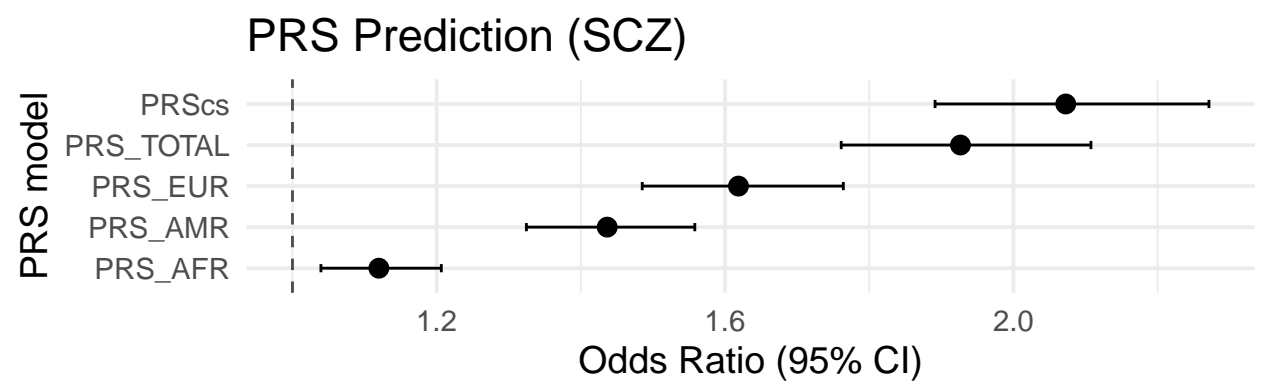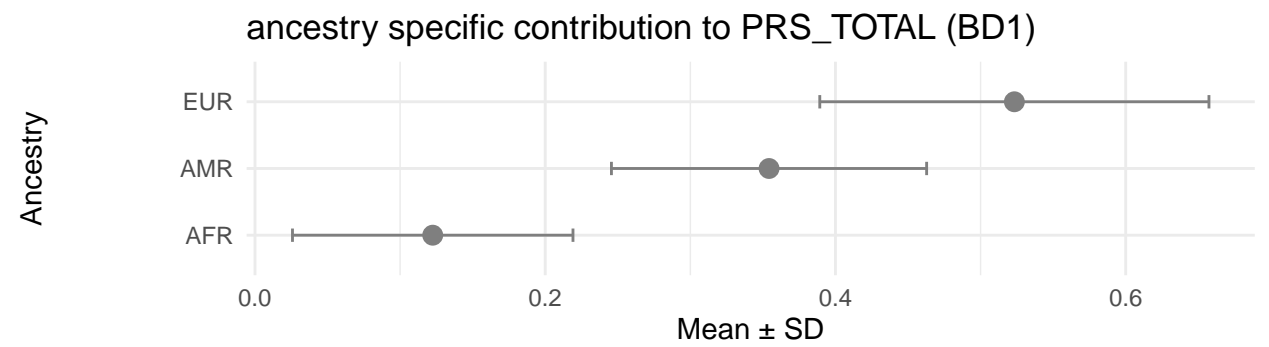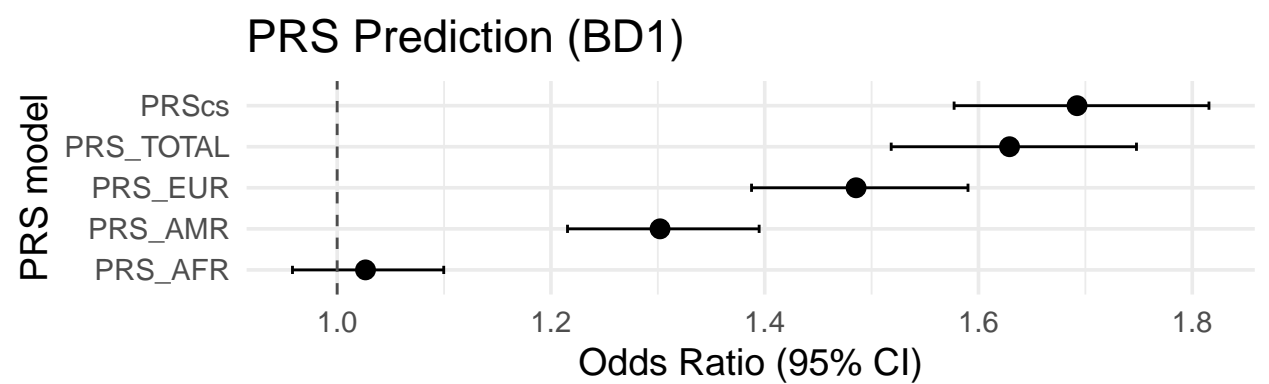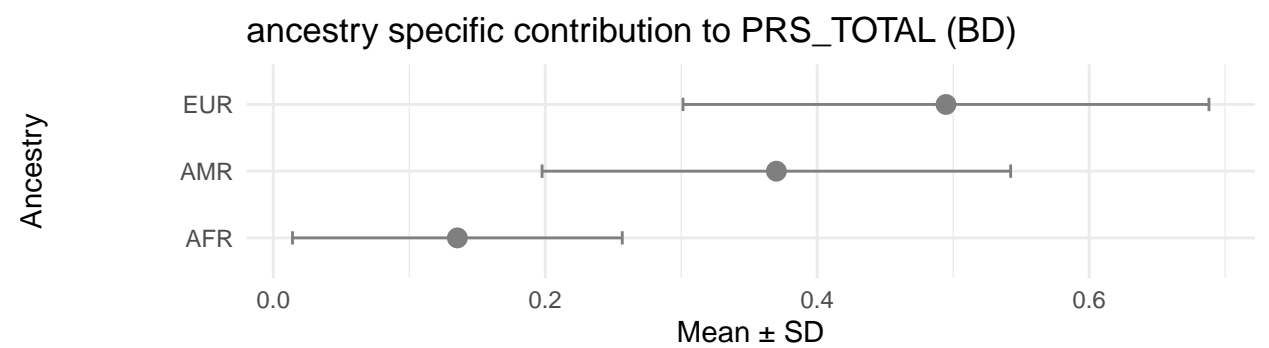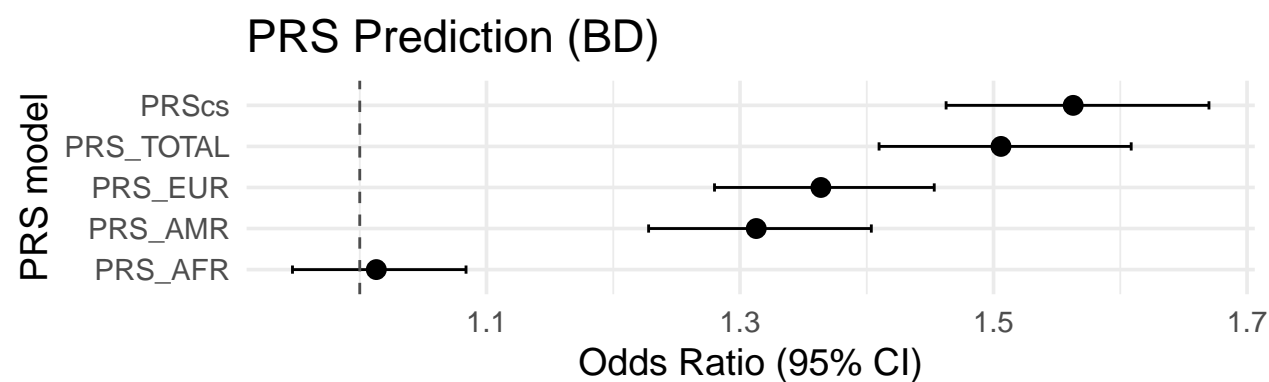

Ancestry = AMR

sFig6.a

MDD

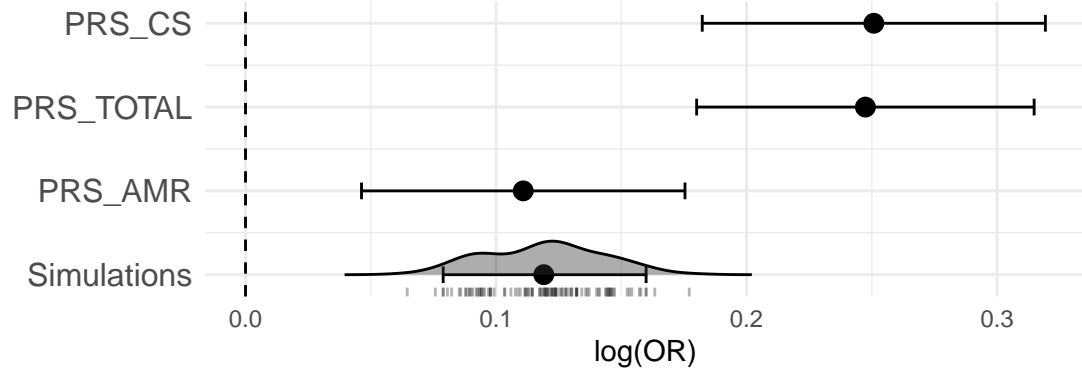

SCZ

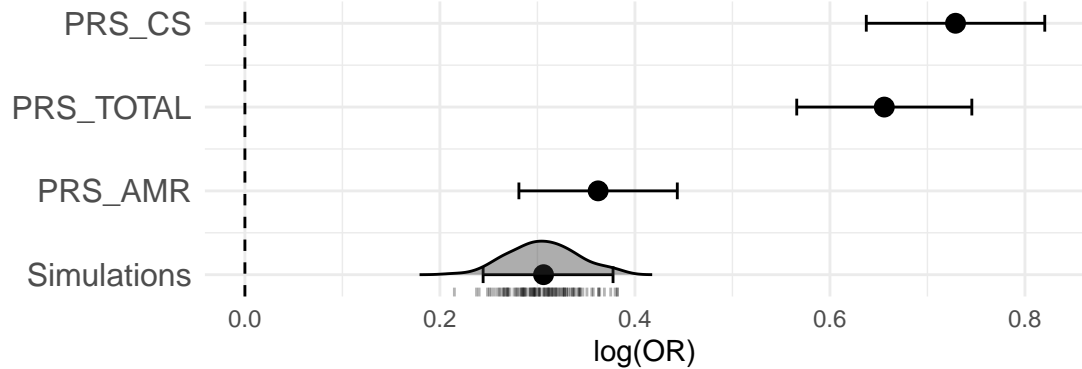

BD1

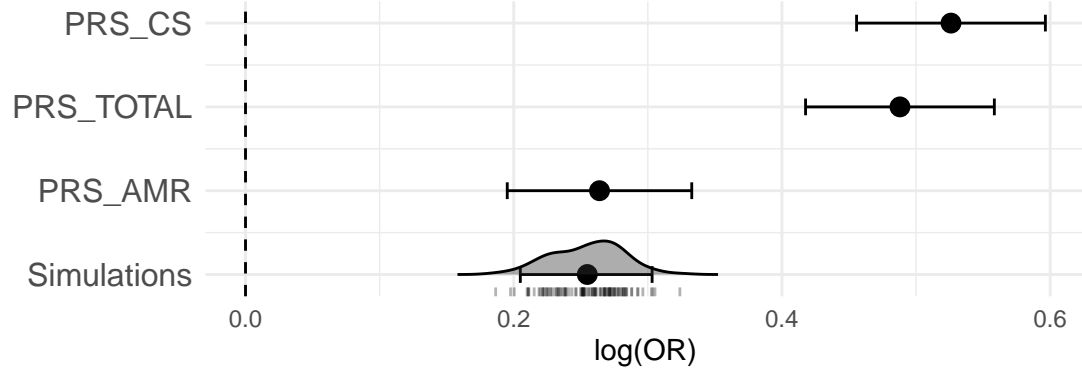

BD

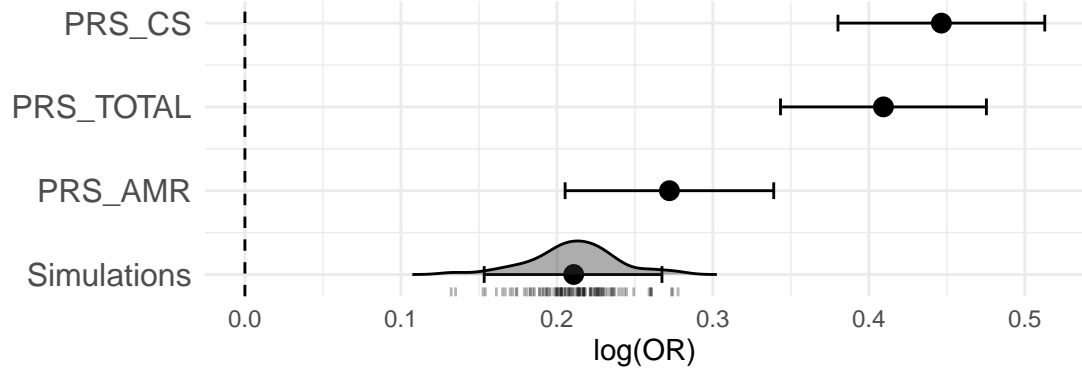

Ancestry = AFR

sFig 6b.

MDD

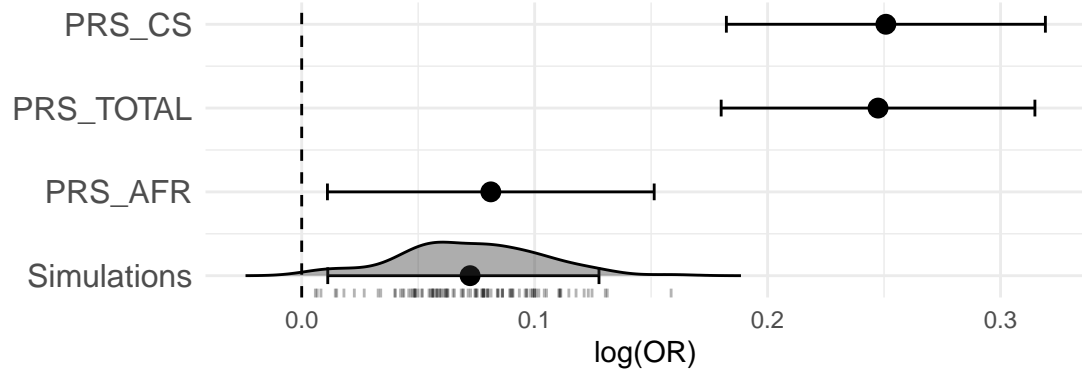

SCZ

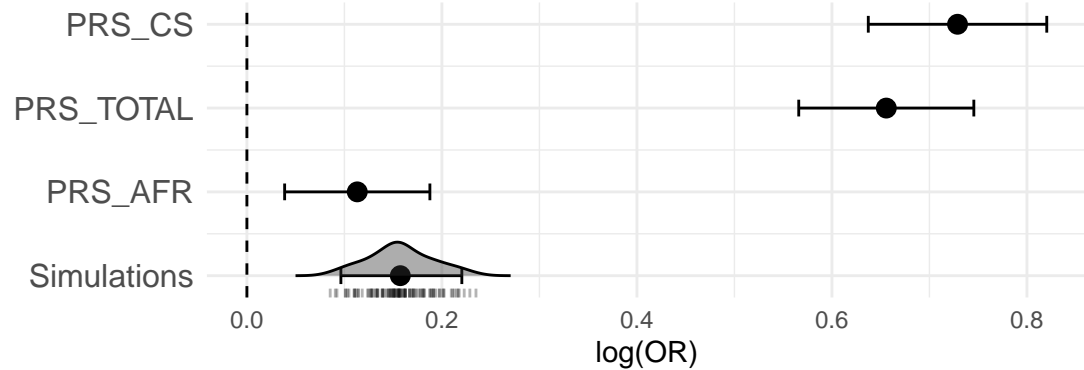

BD1

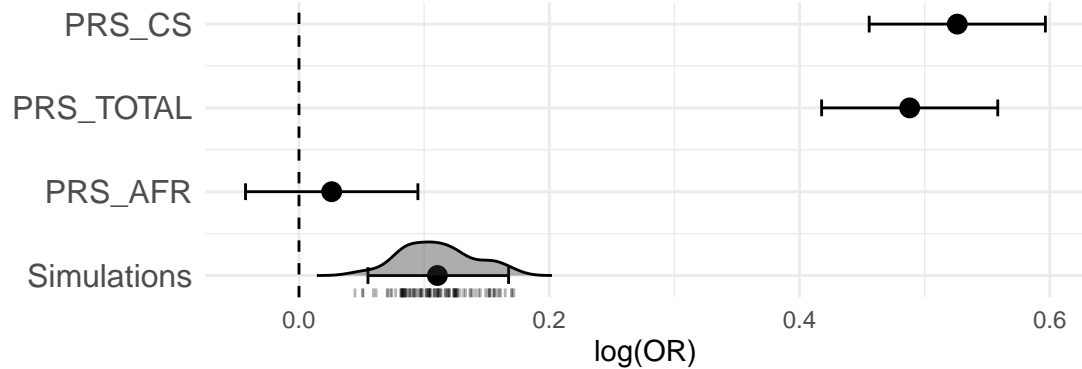

BD

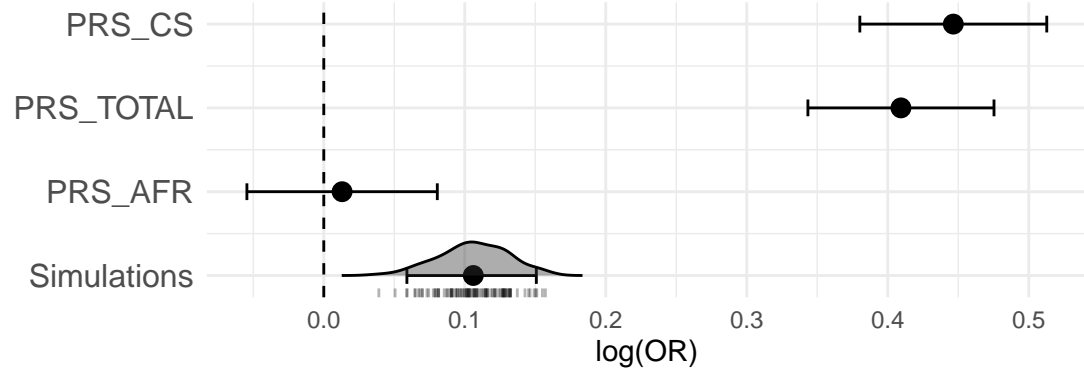

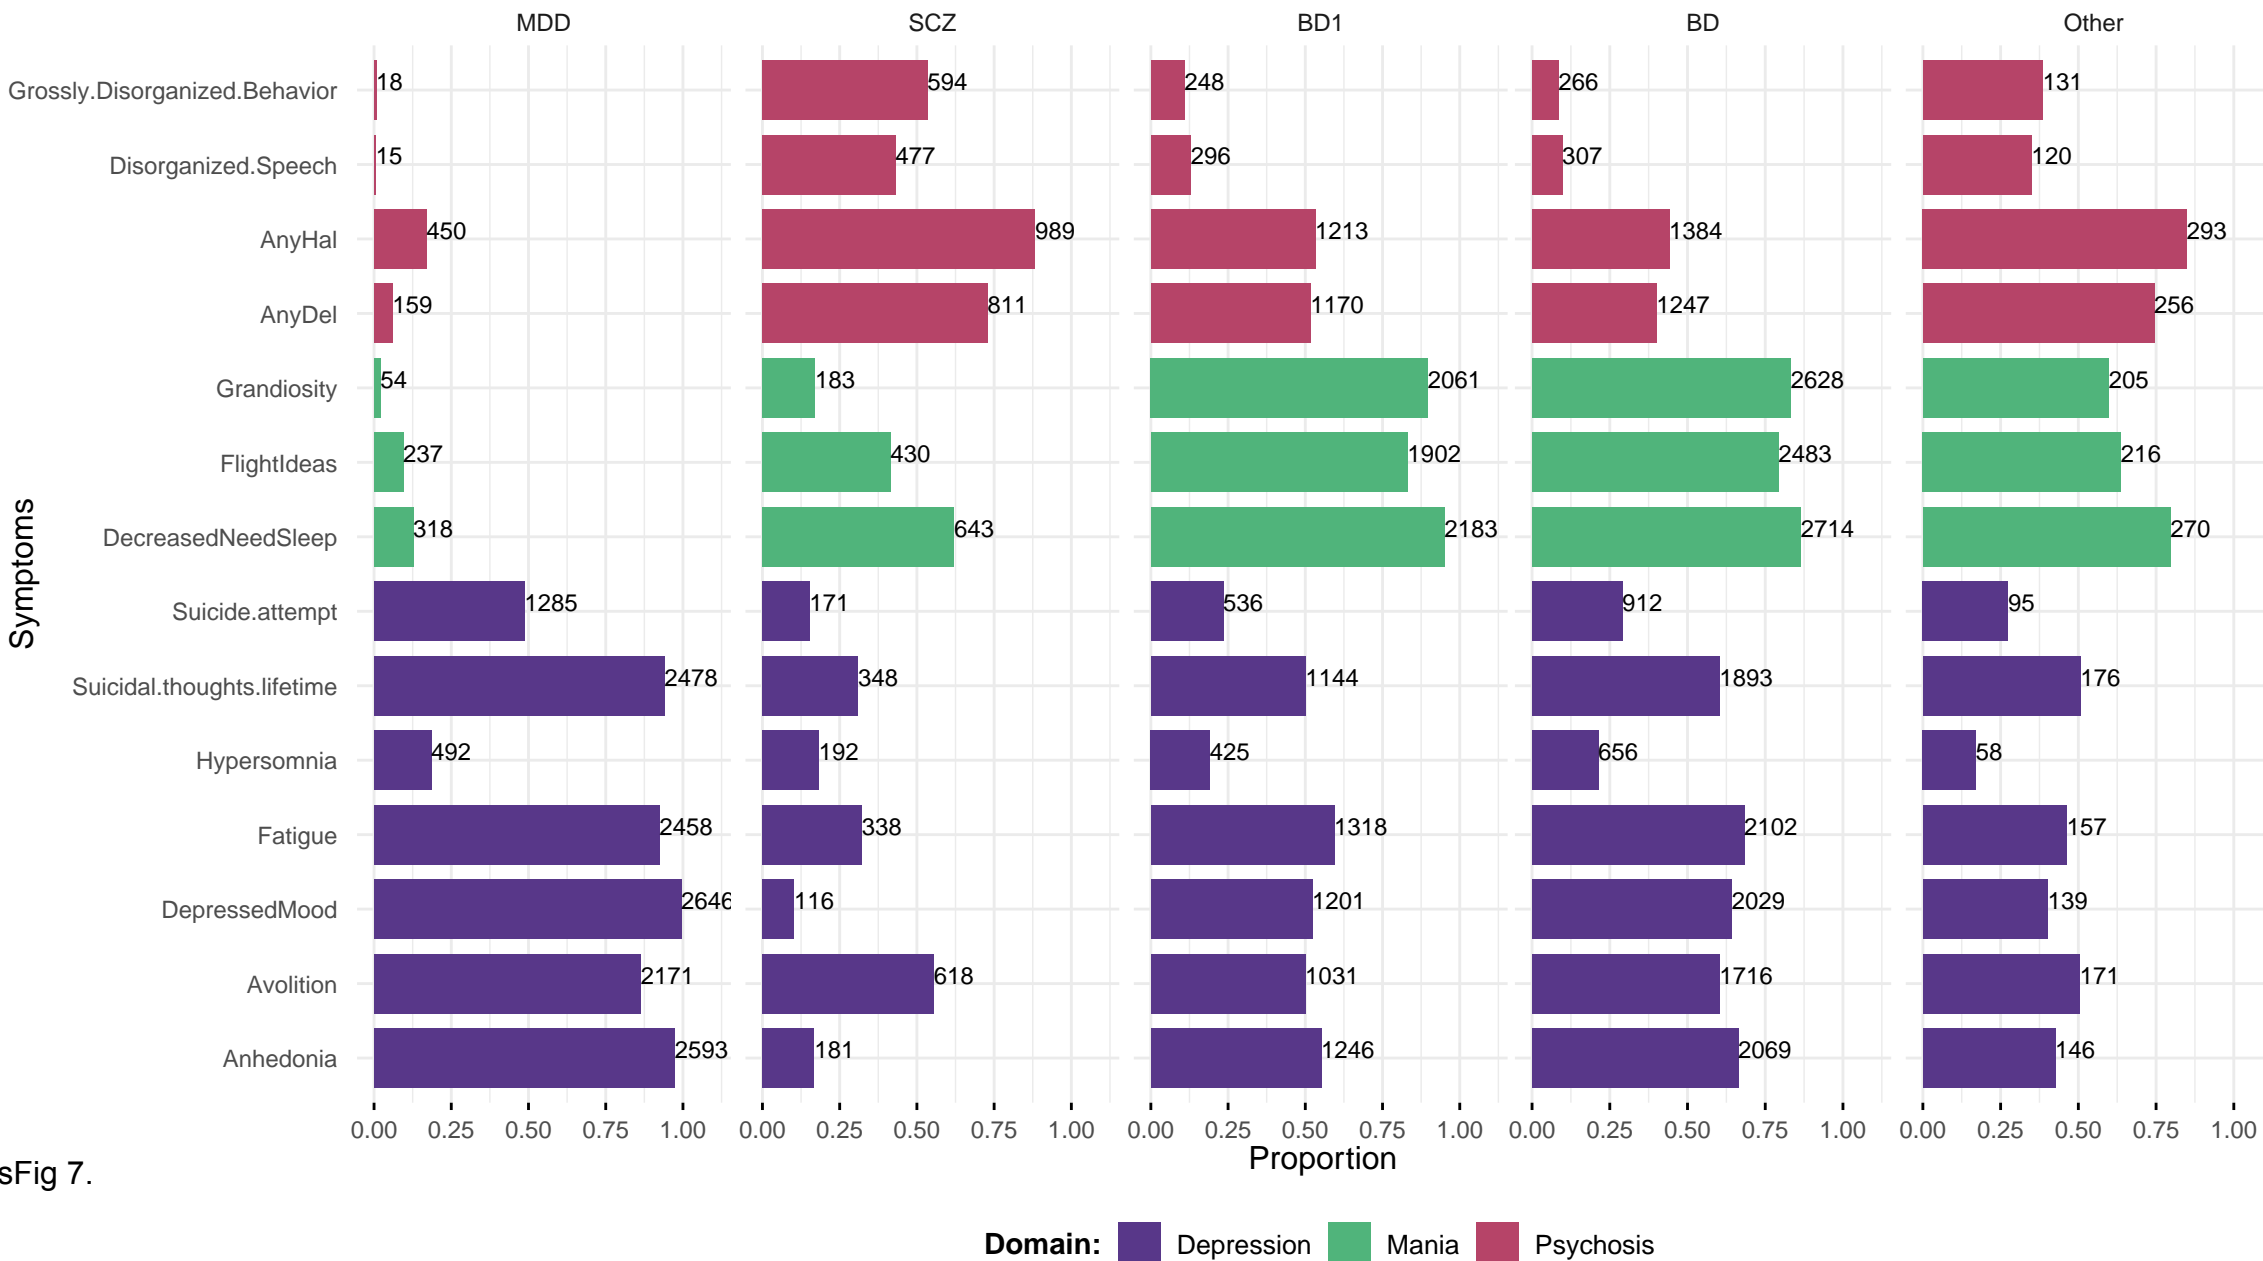

sFig 7.

sFig 8a.

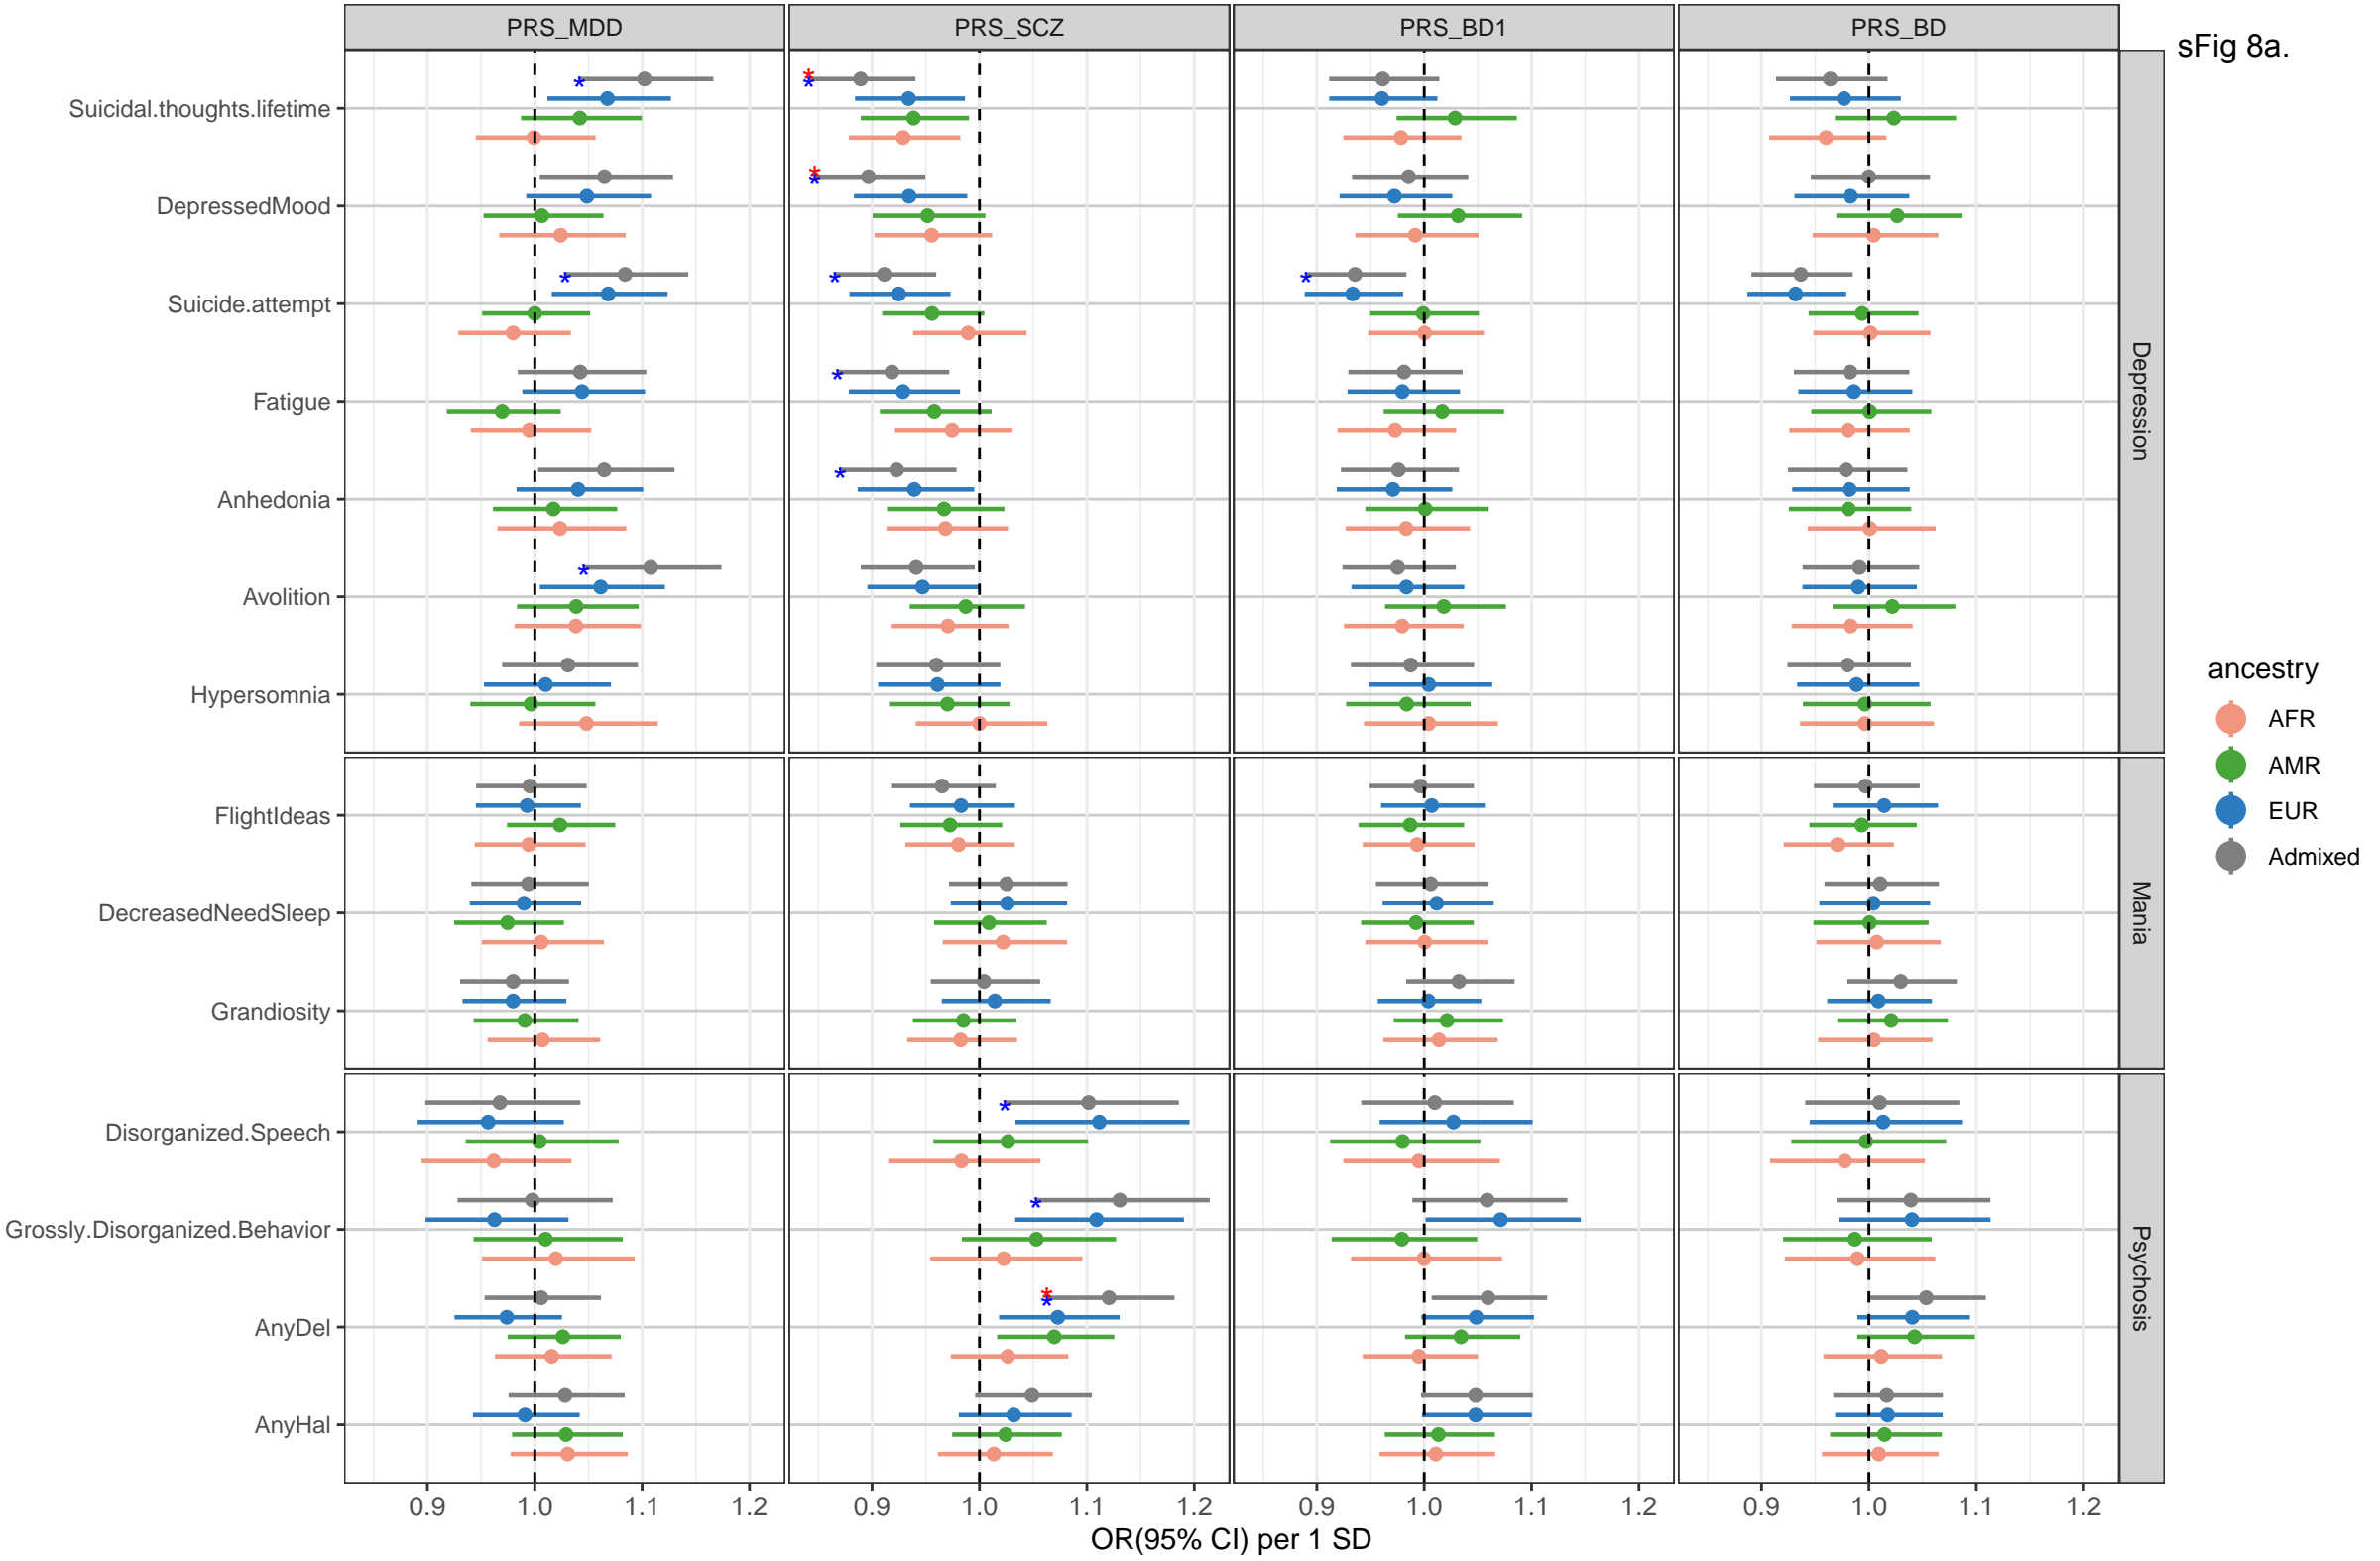

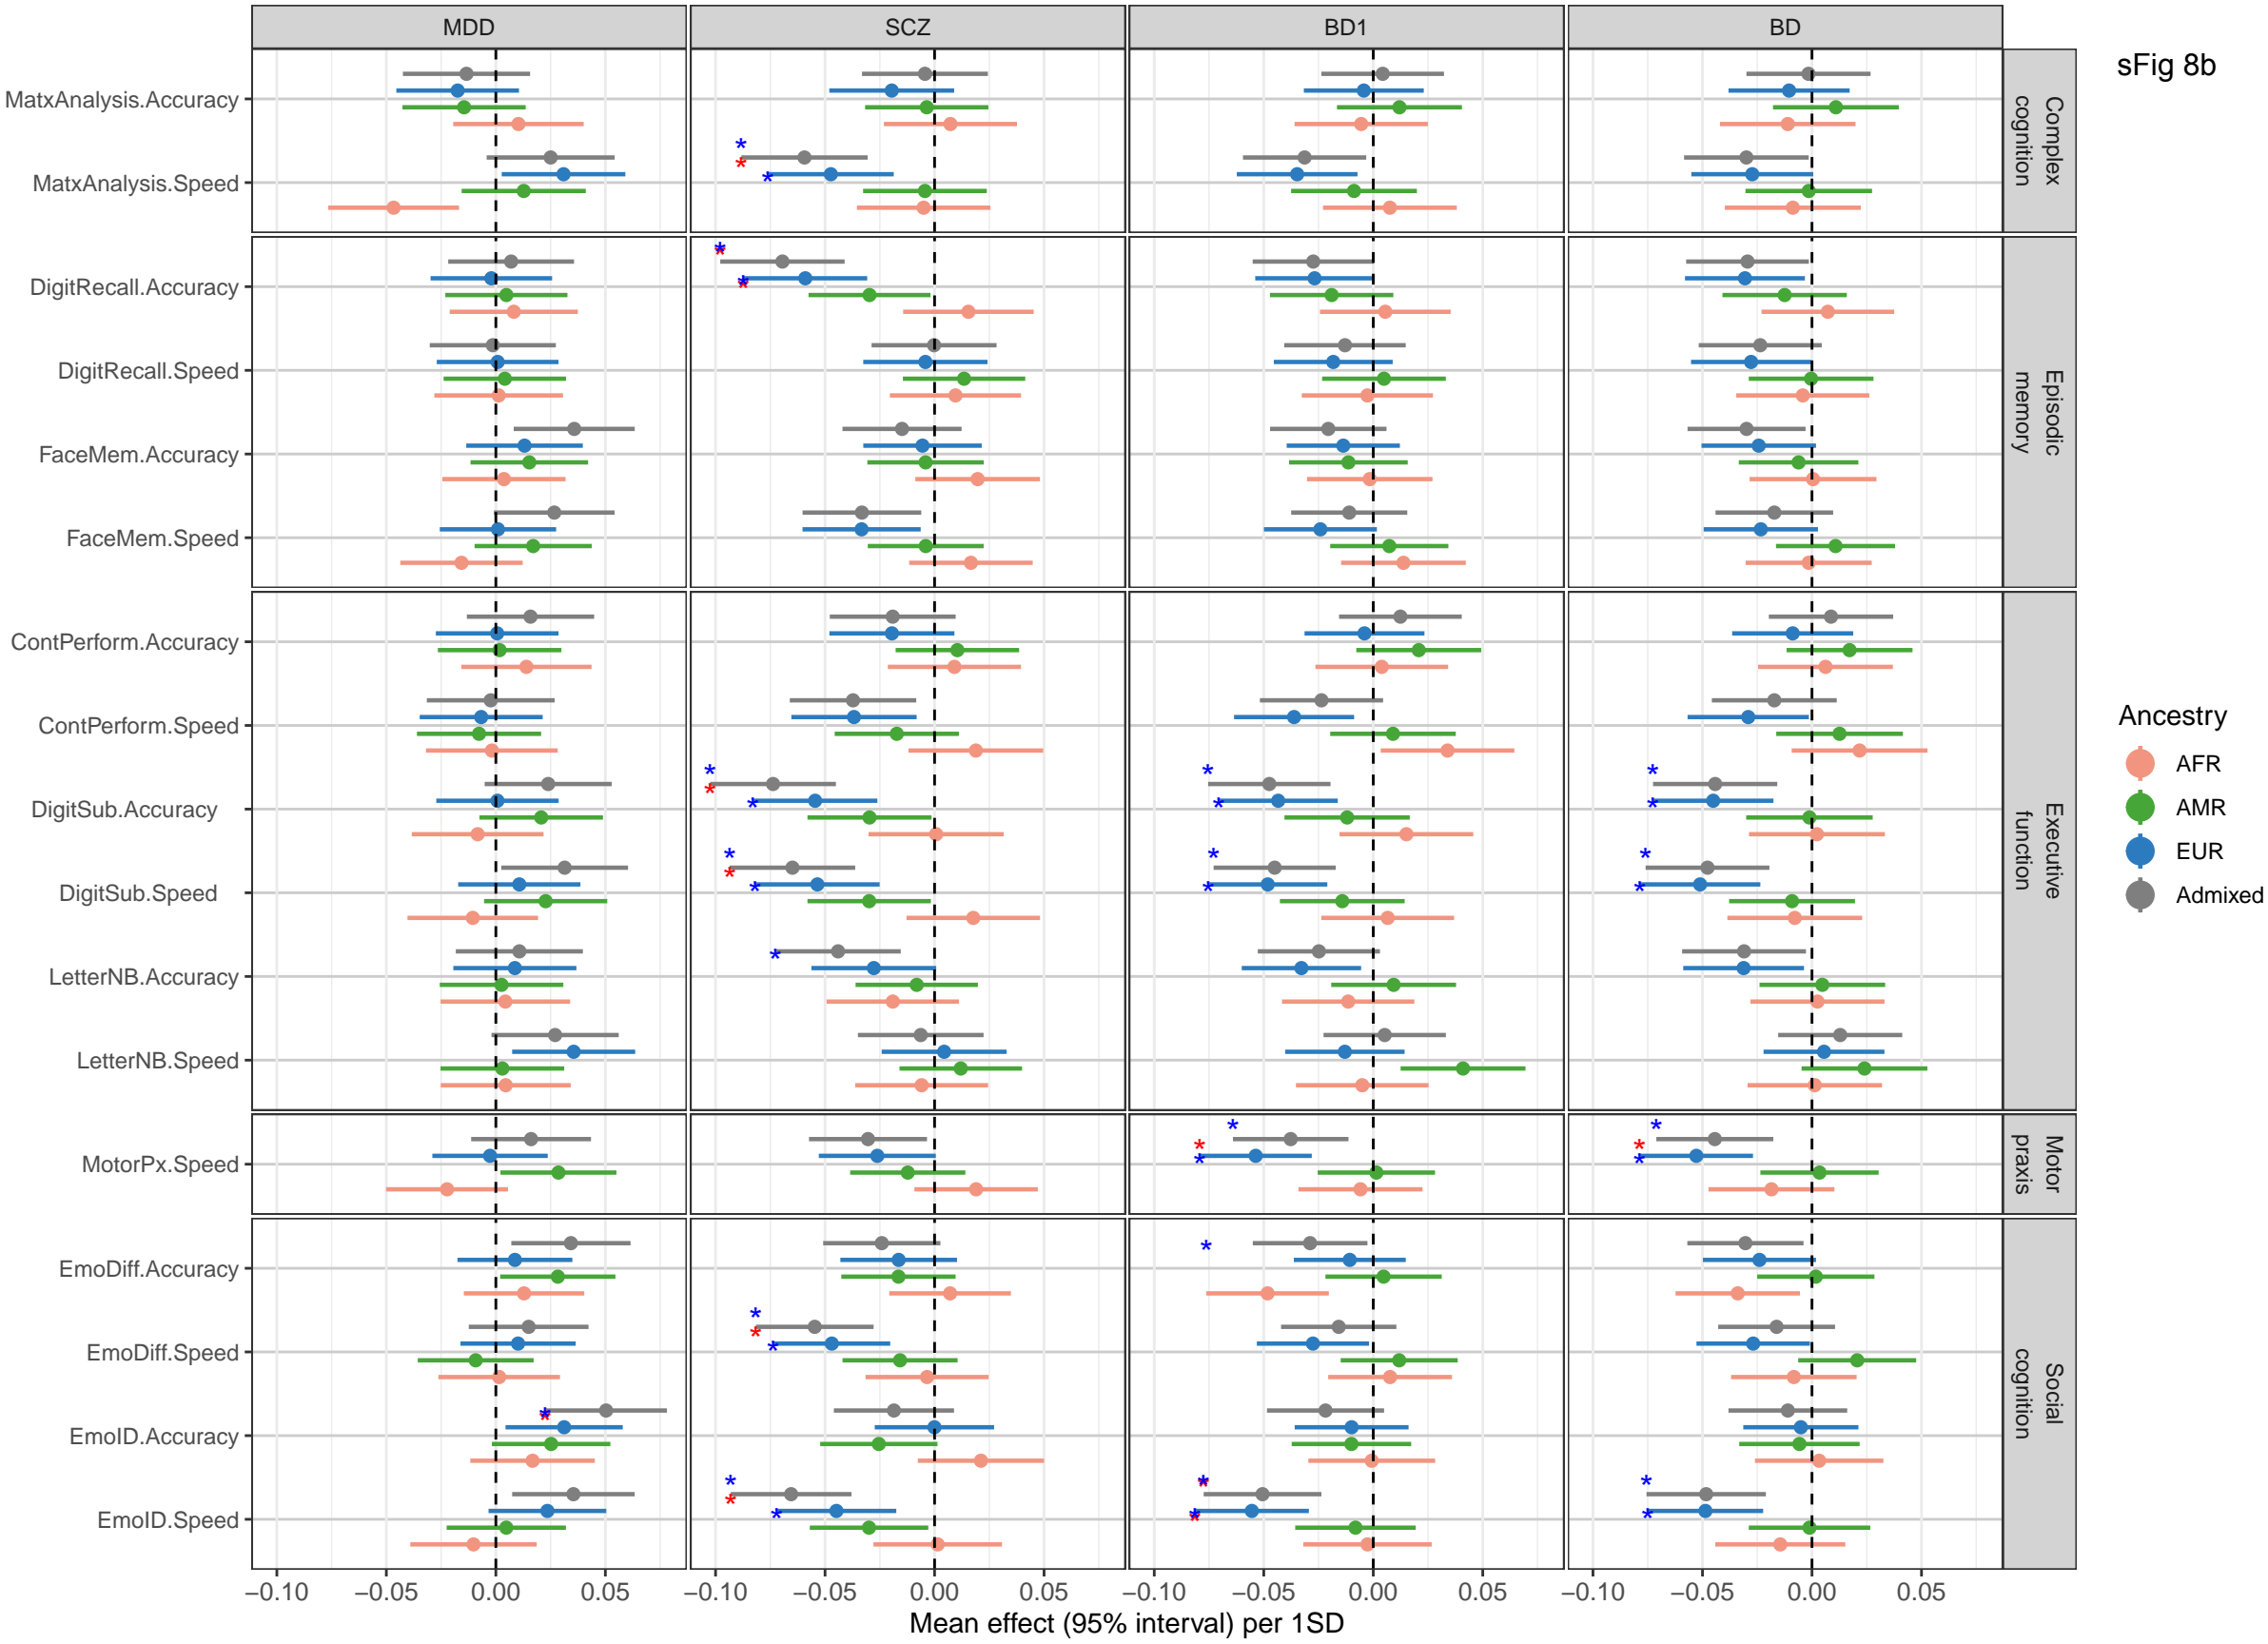

sFig 9

Cumulative evidence against the null

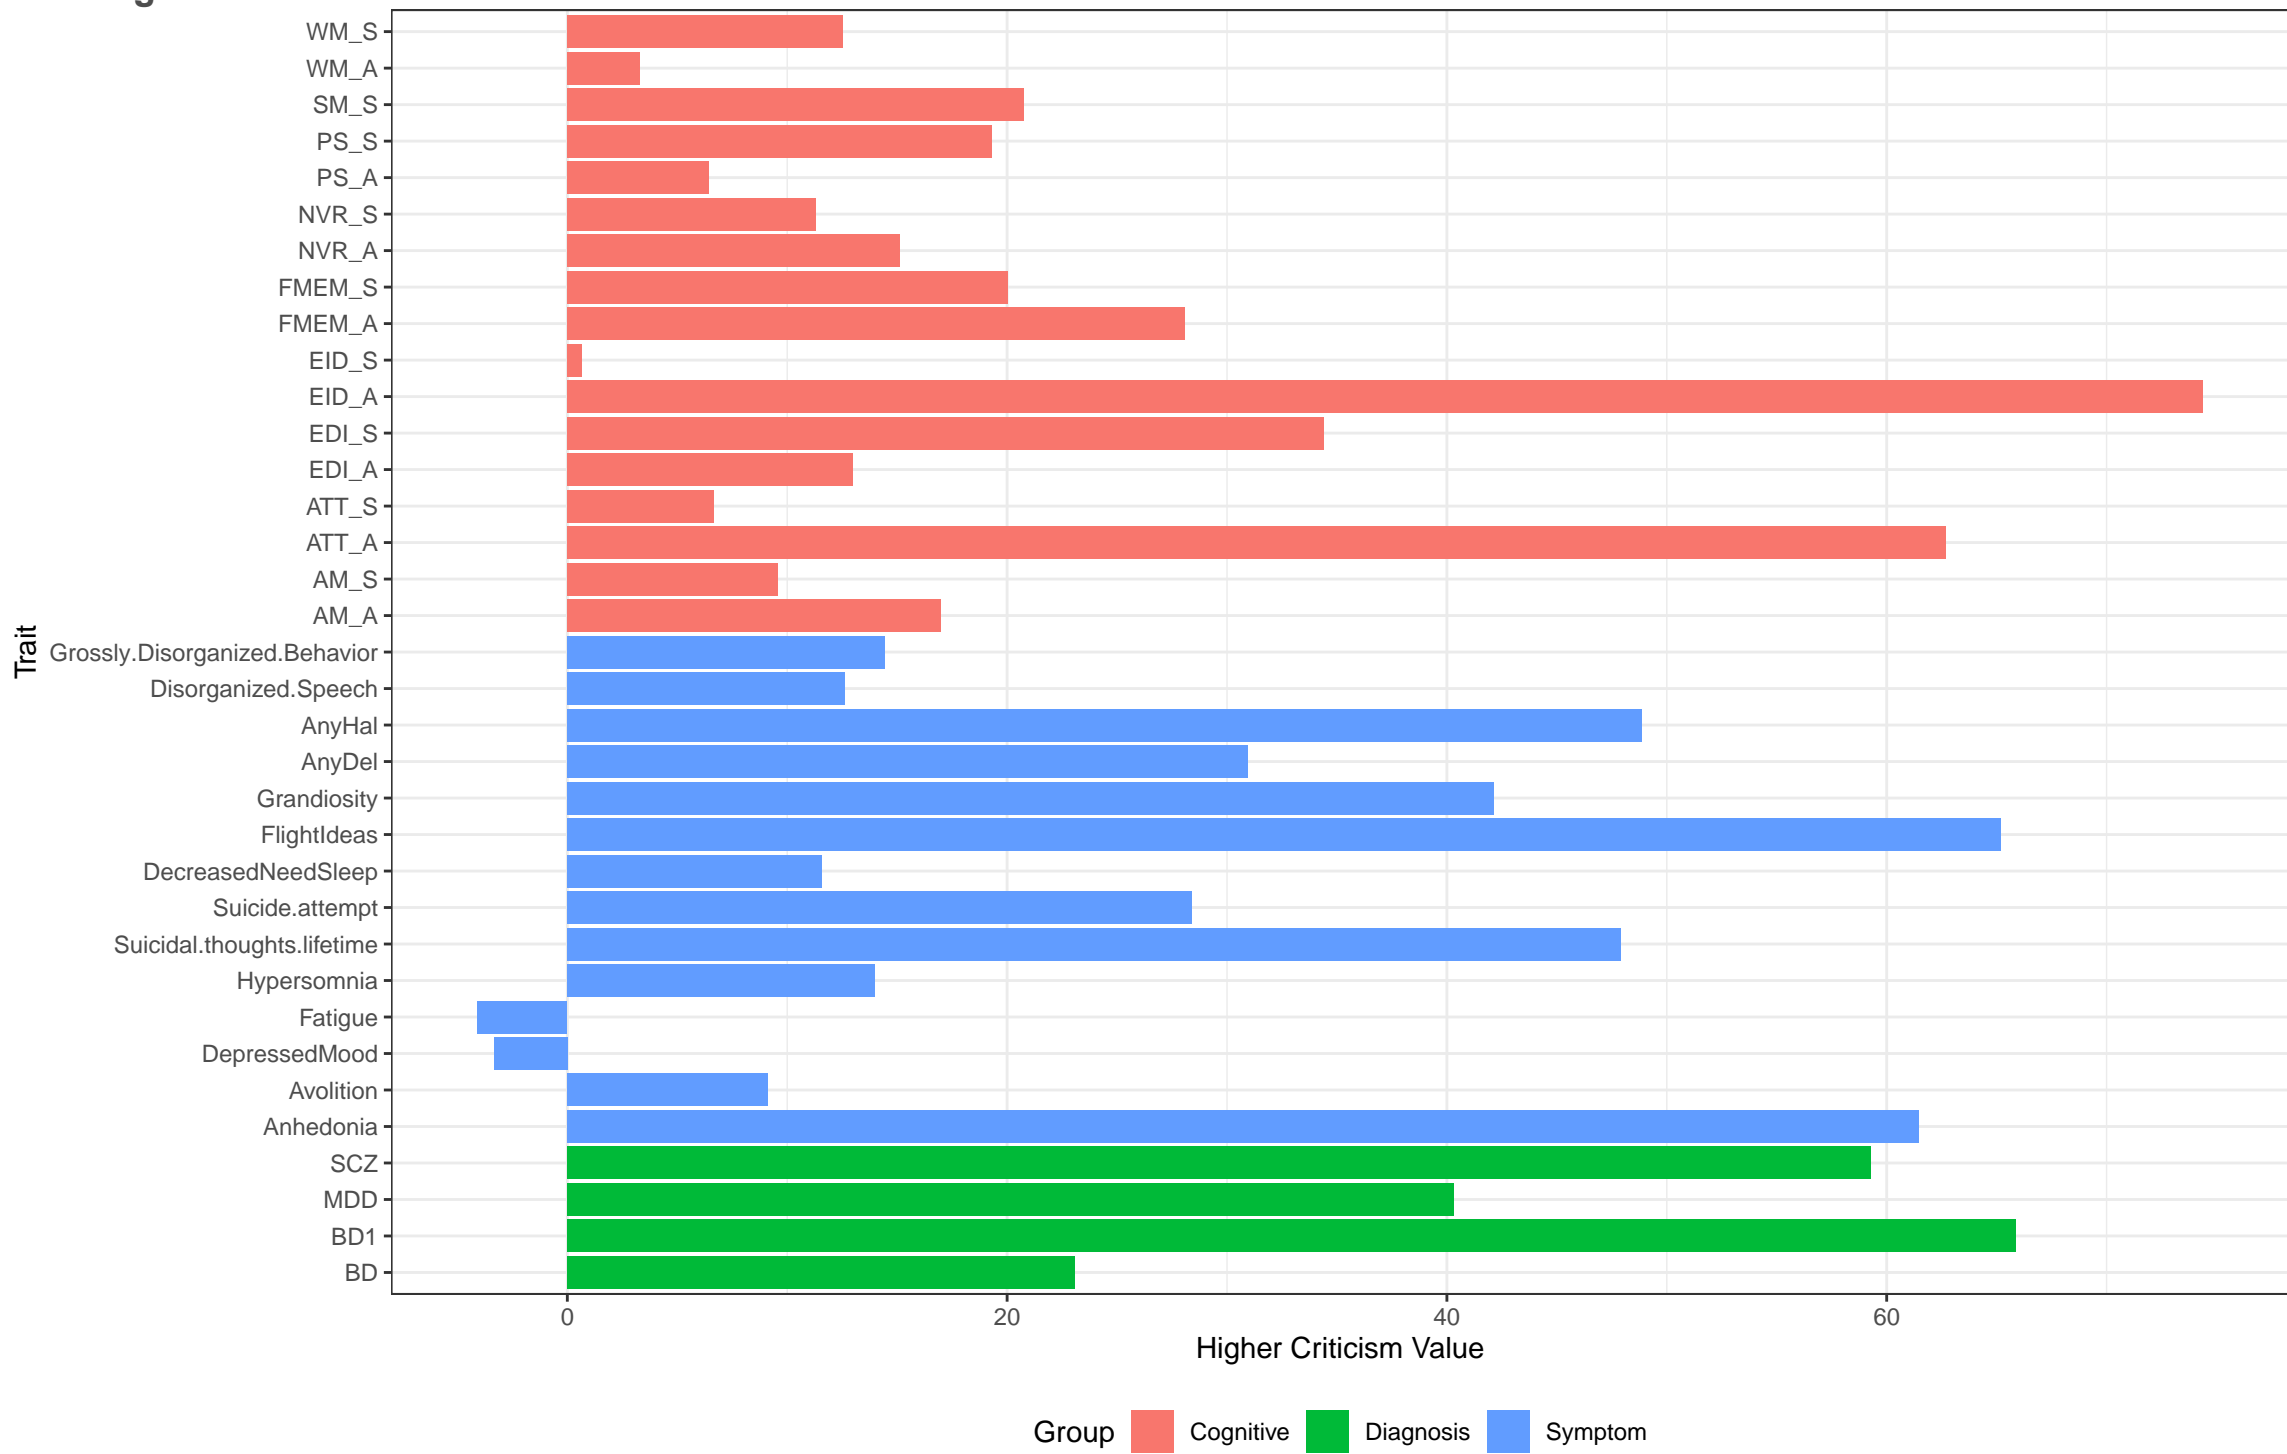

Supplement: Supplementary file [file 5ba21bff50de360a64d4a819.pdf]
